# Supplementary material
Source: PubMed Central journal article supplement (PMC8105271)
Supplement: NIHMS1654838-supplement-Supplemental_Publication_Material.pdf [file NIHMS1654838-supplement-Supplemental_Publication_Material.pdf]

## SUPPLEMENTAL MATERIAL

### Intracellular AIBP regulates oxidized LDL-induced mitophagy in macrophages

Soo-Ho Choi, Colin Agatisa-Boyle, Ayelet Gonen, Alisa Kim, Jungsu Kim, Elena Alekseeva, Sotirios Tsimikas, Yury I. Miller

Department of Medicine University of California San Diego, La Jolla, CA 92093

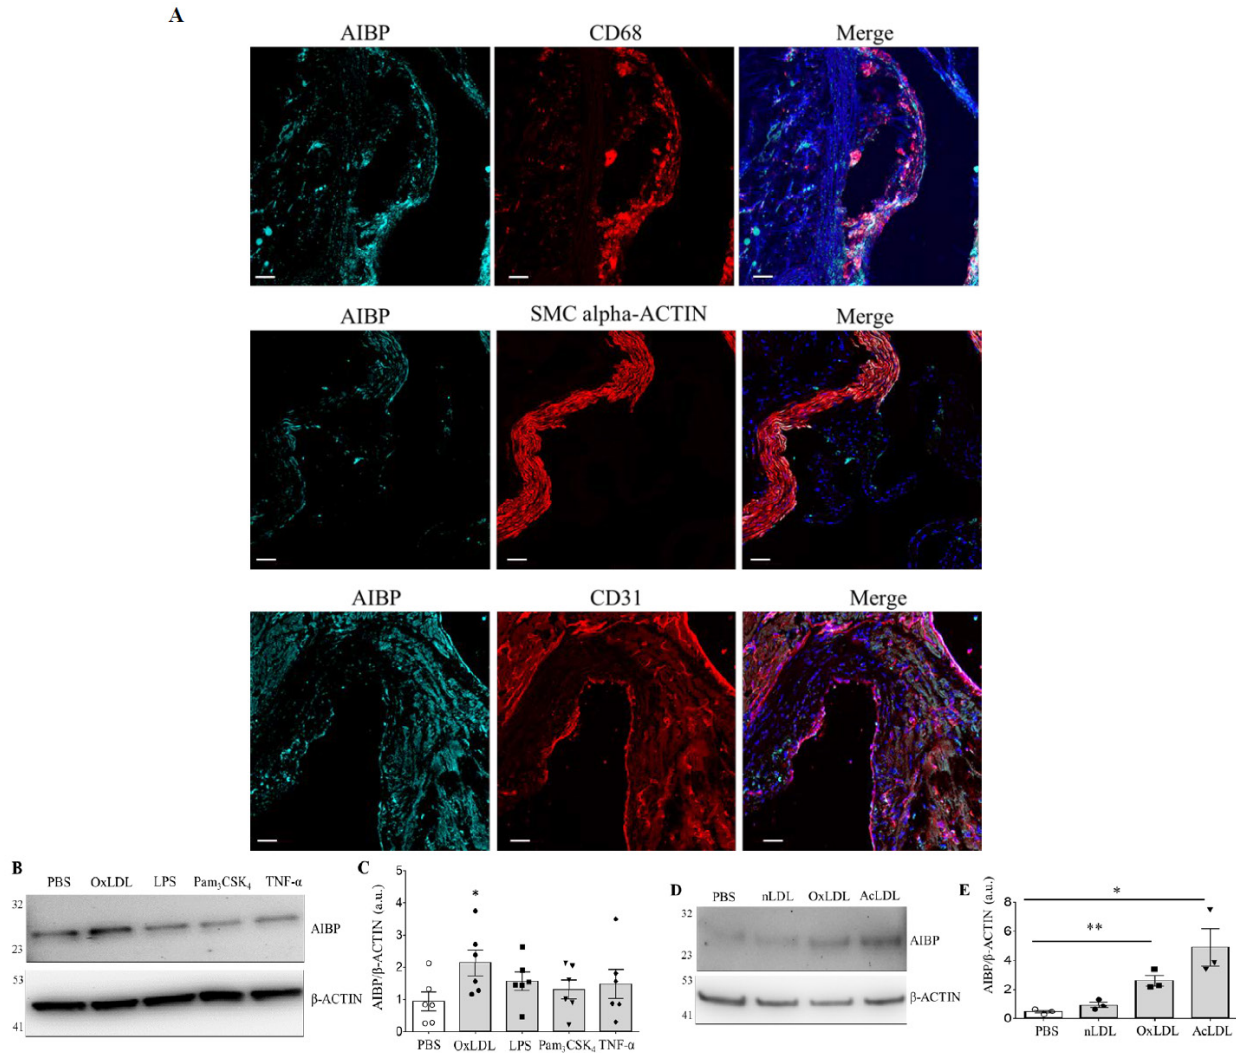

**Supplemental Figure I.** AIBP immunostaining colocalization with markers of macrophages, smooth muscle cells and endothelial cell in murine atherosclerotic lesion. **(A)** Sections from the aortic root of hypercholesterolemic WT mice were stained with the monoclonal anti-AIBP antibody BE-1 (cyan), CD68 (red), SMC alpha-ACTIN (red), or CD31 (red) antibodies. **(B-E)** BMDM isolated from WT mice were stimulated with 25  $\mu$ g/ml OxLDL, 100 ng/ml LPS, 100 ng/ml Pam<sub>3</sub>CSK<sub>4</sub>, 20 ng/ml TNF- $\alpha$ , 25  $\mu$ g/ml nLDL, or 25  $\mu$ g/ml AcLDL for 24 h. Cell lysates were immunoblotted with polyclonal anti-AIBP and  $\beta$ -ACTIN antibodies. Mean $\pm$ SEM; N=3-7. \*, p<0.05; \*\*, p<0.005. Scale bar, 50  $\mu$ m.

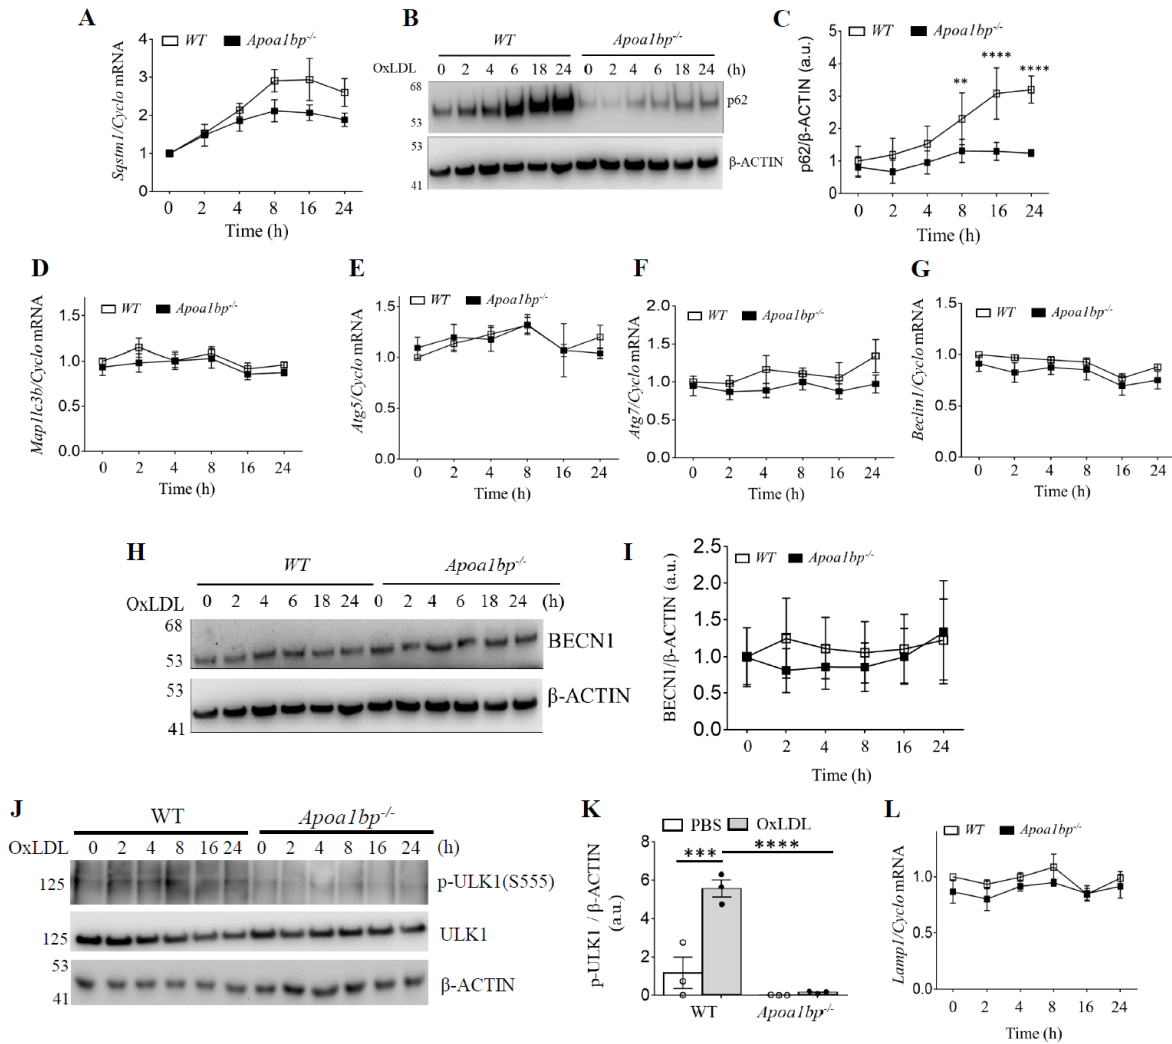

**Supplemental Figure II.** Expression of genes involved in autophagy in in WT and *ApoA1bp*<sup>-/-</sup> macrophages. BMDM isolated from WT and *ApoA1bp*<sup>-/-</sup> mice were stimulated with 25 μg/ml OxLDL for indicated time. (A) mRNA expression of *Sqstm1* was measured by qPCR. (B-C) SQSTM1/p62 expression was measured by immunoblotting and band intensities were quantified. (D-G) mRNA expression of *Map1lc3b*, *Atg5*, *Atg7*, and *Beclin1* were measured by qPCR. (H-I) Expression of Beclin1 was measured by immunoblotting and band intensities were quantified. (J-K) Expression of total ULK1 and phosphorylation of ULK1 was measured by immunoblotting and band intensities at 24 h were quantified. (L) mRNA expression of *Lamp1* was measured by qPCR. Mean±SEM; N=3-7. \*\*, p<0.005; \*\*\*, p<0.0005; \*\*\*\*, p<0.0001.

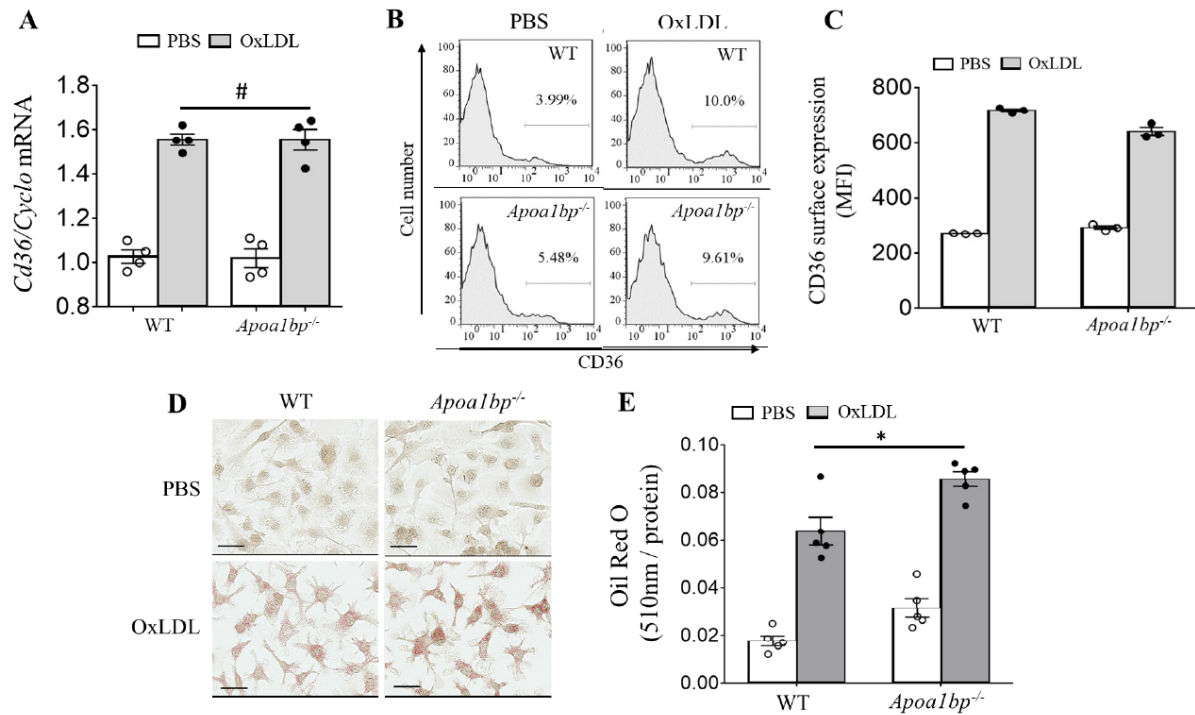

**Supplemental Figure III.** CD36 expression and lipid accumulation in WT and *ApoA1bp*<sup>-/-</sup> macrophage in response to OxLDL. BMDM isolated from WT and *ApoA1bp*<sup>-/-</sup> mice were stimulated with 25  $\mu$ g/ml OxLDL for 24 h. **(A)** mRNA expression of *Cd36* was measured by qPCR. **(B-C)** CD36 expression on cell surface was measured by flow cytometry and MFI was quantified. **(D-E)** BMDM were stained with Oil Red O and for quantification cells were extracted with isopropanol and optical density at 510nm was measured. Mean $\pm$ SEM; N=3-5. #,  $p > 0.05$ . Scale bar, 25  $\mu$ m

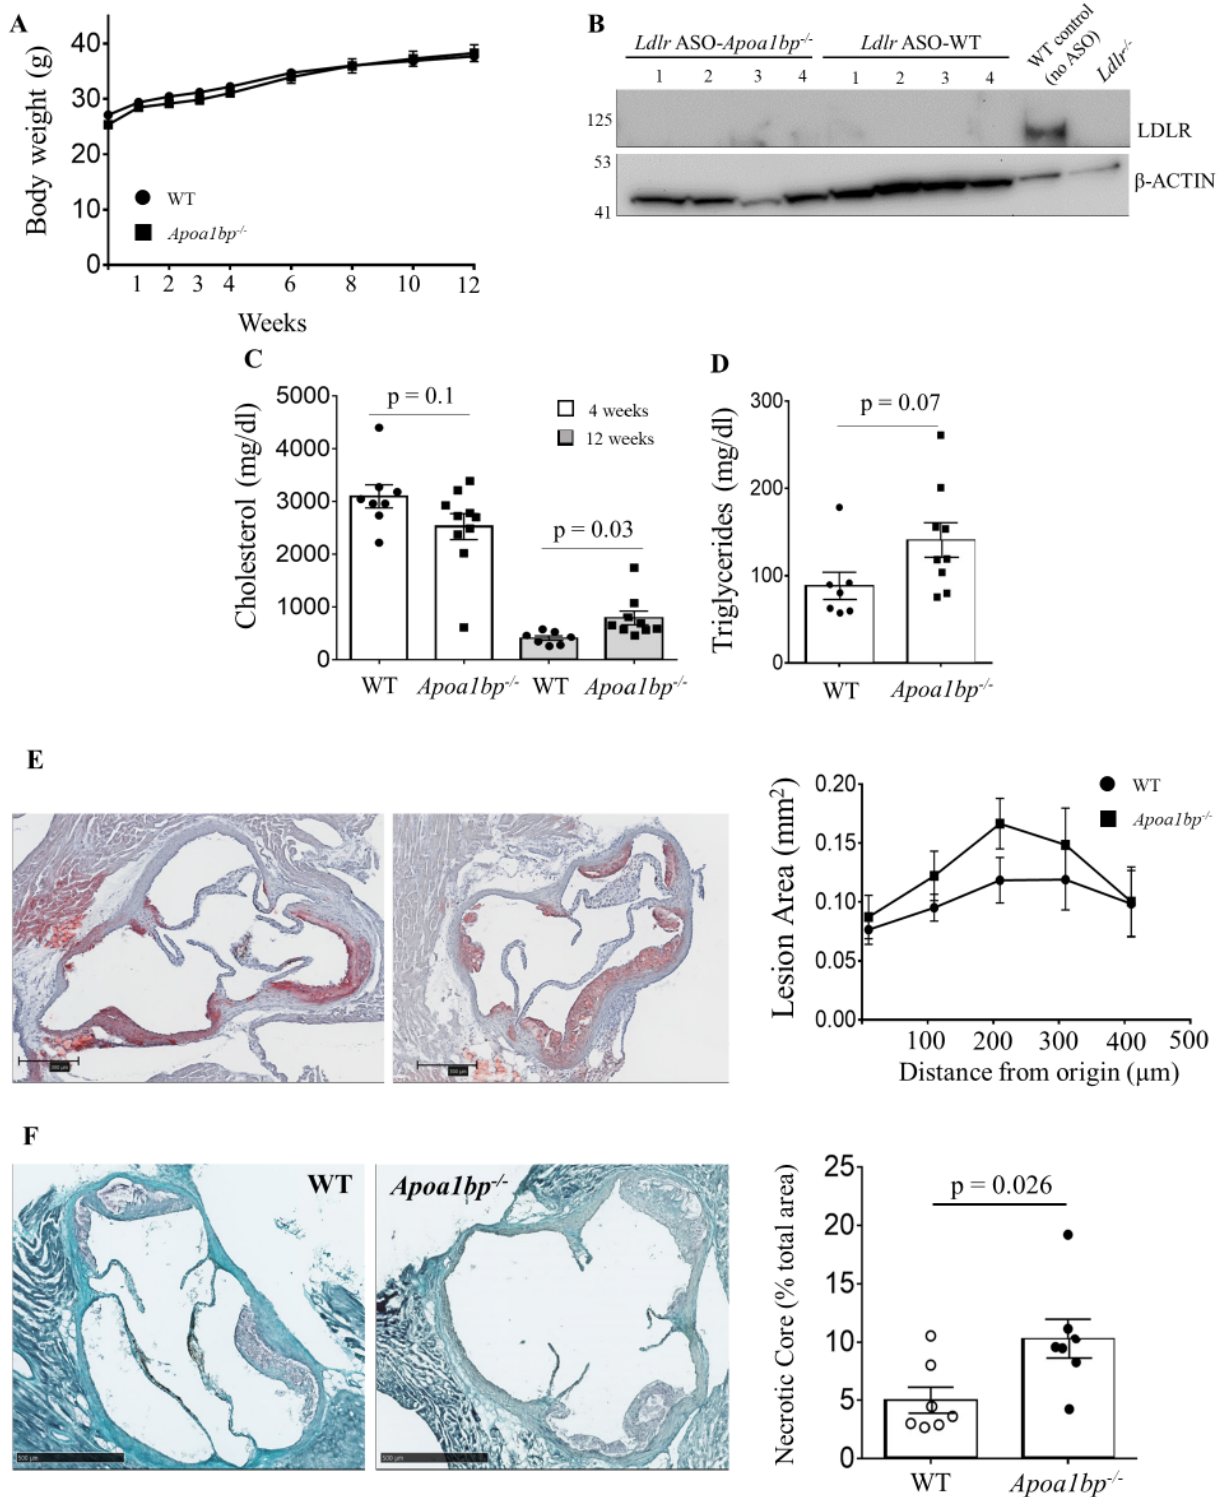

**Supplemental Figure IV.** Weight, plasma lipids and atherosclerosis in WT and *ApoA1bp*<sup>-/-</sup> mice injected with *Ldlr* ASO and fed a Western diet. **(A)** Weight gain. **(B)** Liver expression of the LDLR protein. **(C)** Total cholesterol levels at 4 and 12 weeks after the start of ASO/diet intervention. **(D)** Triglyceride levels at 12 weeks. **(E)** Aortic root atherosclerotic lesions representative Oil Red O images and size as a function of the distance from the first leaflet appearance. **(F)** Representative images of aortic root stained with Gomori's trichrome and necrotic core areas as the percentage of total lesion area. Mean±SEM; N=7-10. Scale bars, 300µm (E) and 500µm (F).

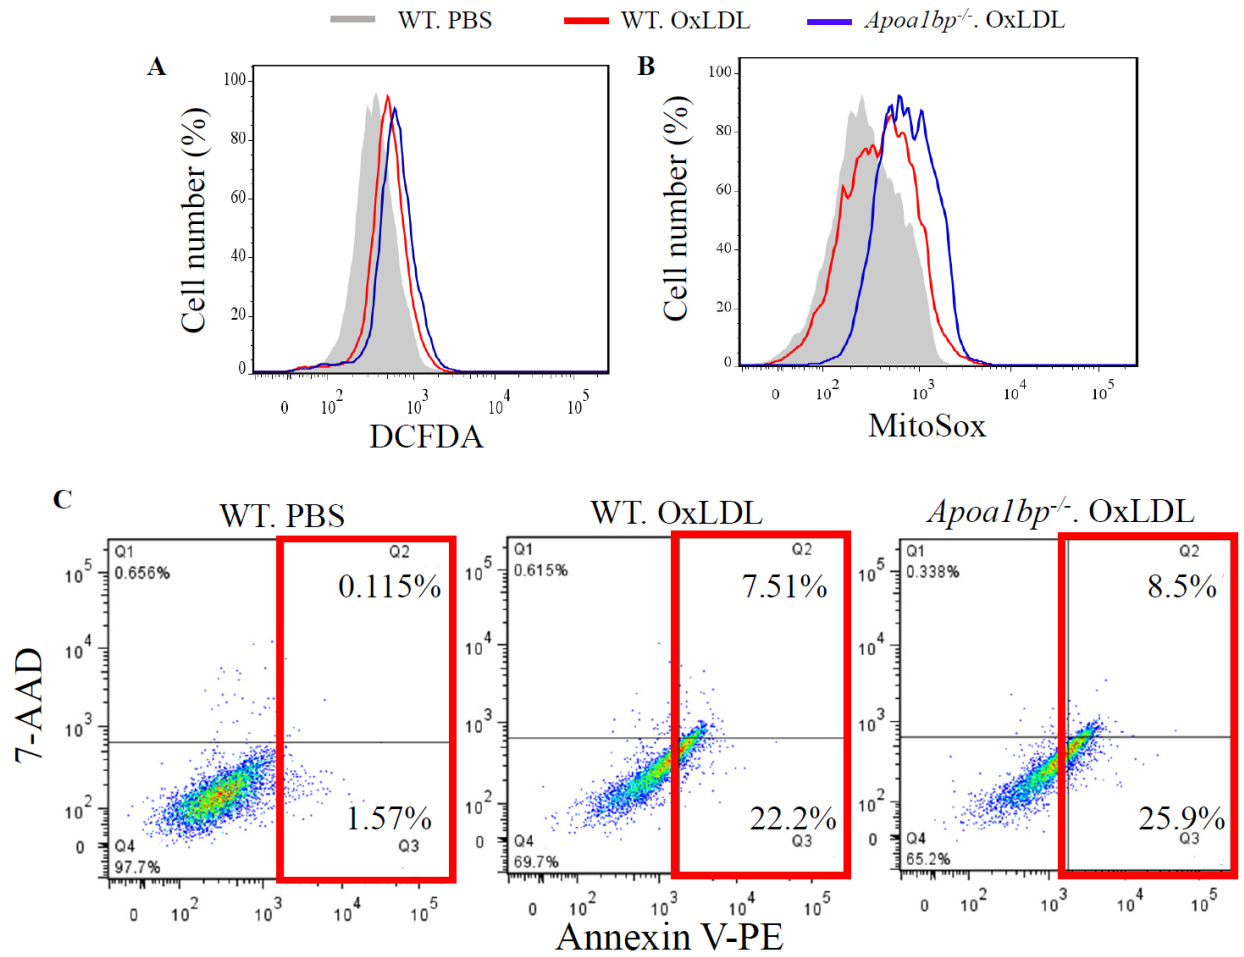

**Supplemental Figure V.** Representative histogram and dot plots to illustrate quantitative results shown in Figure 4. Cellular (A) and mitochondrial (B) ROS. (C) Apoptotic (annexin V) and necrotic (7AAD) cells.

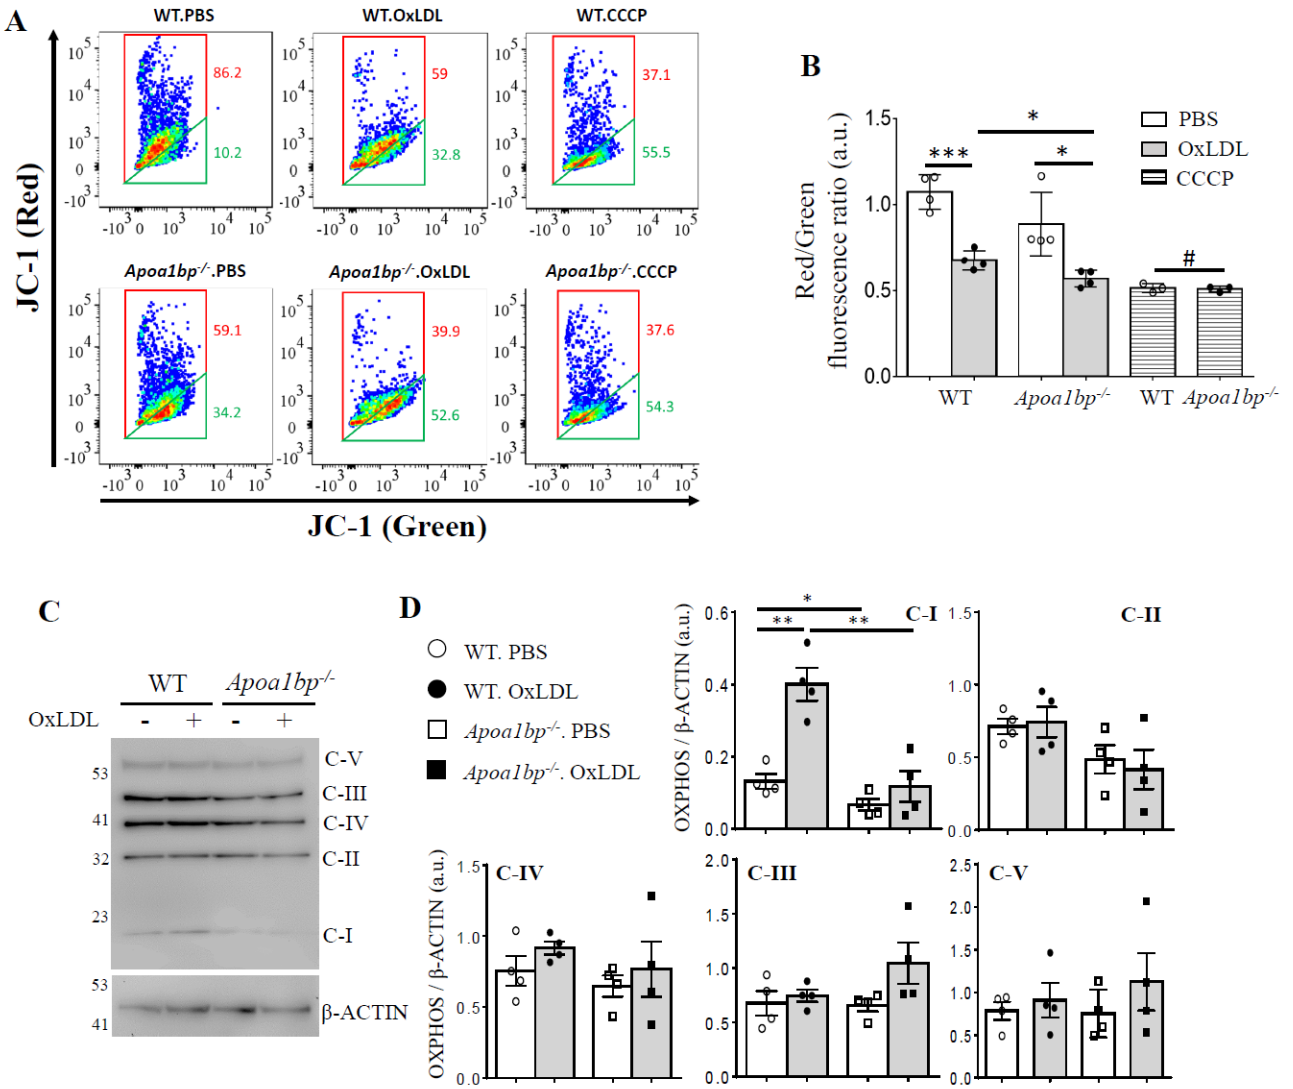

**Supplemental Figure VI.** AIBP regulates mitochondrial function in macrophage. **(A and B)** Mitochondrial membrane potential was measured using JC-1 dye in a flow cytometry assay, and red/green fluorescence intensity ratio was quantified as described in Methods. Ten  $\mu$ M CCCP, an uncoupling agent, was used as a positive control for membrane depolarization. **(C and D)** Expression of OXPHOS complexes I-V was measured by immunoblot. Mean $\pm$ SEM; N=3-4. \*,  $p < 0.05$ ; \*\*,  $p < 0.005$ ; \*\*\*,  $p < 0.0005$ ; \*\*\*\*,  $p < 0.0001$ ; #,  $p > 0.05$ .

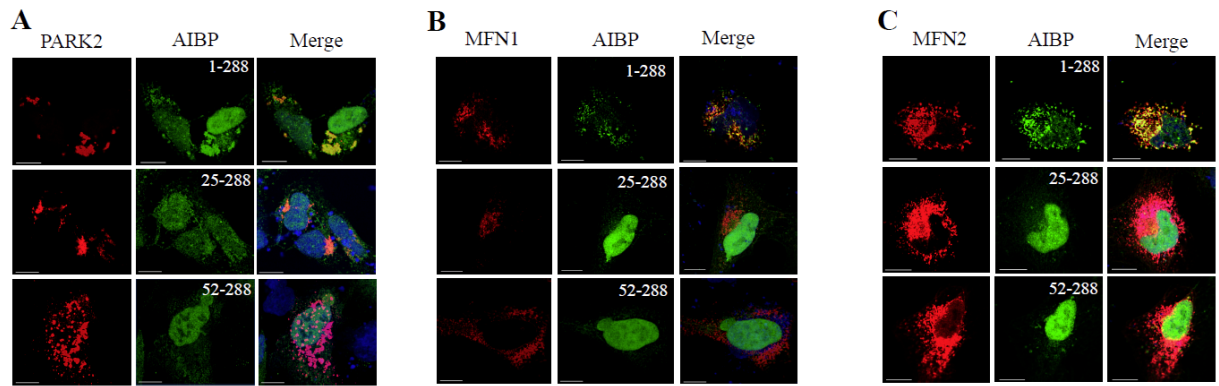

**Supplemental Figure VII.** AIBP associates with PARK2, MFN1 and MFN2. HepG2 cells were co-transfected with flag-tagged AIBPs (1-289 aa, 25-289 aa, or 52-289 aa) together with (A) PARK2-myc, (B) MFN1-myc, or (C) MFN2-myc. Cells were stained with anti-flag and anti-myc antibodies, and DAPI. Scale bar: 10  $\mu$ m.

## MAJOR RESOURCES TABLE

### Animals

| Species (Mouse)               | Vendor or Source                            | Background strain | Sex  |
|-------------------------------|---------------------------------------------|-------------------|------|
| C57BL/6J                      | The Jackson Laboratory;<br>Stock No: 000664 | C57BL/6J          | Male |
| <i>Apoa1bp</i> <sup>-/-</sup> | Developed and bred at UCSD                  | C57BL/6J          | Male |

### Cultured cells

| Name                                      | Vendor or Source                                              | Catalog No |
|-------------------------------------------|---------------------------------------------------------------|------------|
| BMDM                                      | Isolated from C57BL/6J and <i>Apoa1bp</i> <sup>-/-</sup> mice | N/A        |
| HEK293                                    | ATCC                                                          | CRL-1573   |
| HepG2                                     | ATCC                                                          | HB-8065    |
| Murine myeloma                            | ATCC                                                          | CRL-1580   |
| L929 fibroblasts                          | ATCC                                                          | CCL-1      |
| Platinum-E Retroviral packaging cell line | Cell BioLabs                                                  | RV-101     |

### Antibodies

| Target antigen        | Vendor or Source          | Catalog No | Working concentration                           |
|-----------------------|---------------------------|------------|-------------------------------------------------|
| LC3                   | Cell Signaling Technology | 3868       | 1:1000 (WB)                                     |
| VDAC                  | Cell Signaling Technology | 4661       | 1:1000 (WB)                                     |
| SIRT3                 | Cell Signaling Technology | 5490       | 1:1000 (WB)<br>1:100 (IF)                       |
| Phospho-ULK1 (Ser555) | Cell Signaling Technology | 5869       | 1:1000 (WB)                                     |
| goat anti-rabbit HRP  | Cell Signaling Technology | 7074       | 1:3000 (WB)                                     |
| goat anti-mouse HRP   | Cell Signaling Technology | 7076       | 1:3000 (WB)                                     |
| SQSTM1/p62            | Abcam                     | Ab56416    | 0.3 µg/ml (WB)<br>10 µg/ml (IF)                 |
| LDLR                  | Proteintech               | 10785-1-AP | 0.6 µg/ml (WB)                                  |
| CD68                  | BioLegend                 | 137001     | 5 µg/ml (IF)                                    |
| CD36                  | BioLegend                 | 102612     | 2 µg/ml (FC)                                    |
| CD31                  | BD Bioscience             | 562939     | 2 µg/ml (IF)                                    |
| CD16/CD32             | BD Bioscience             | 553141     | 10 µg/ml (FC)                                   |
| myc                   | Santa Cruz Biotechnology  | sc-40      | 0.2 µg/ml (WB)<br>10 µg/ml (IF)<br>2 µg/ml (IP) |
| ha                    | Santa Cruz Biotechnology  | sc-805     | 0.2 µg/ml (WB)                                  |
| Ub-HRP                | Santa Cruz Biotechnology  | sc-8017    | 0.2 µg/ml (WB)                                  |
| ULK1                  | Santa Cruz Biotechnology  | sc-390904  | 0.2 µg/ml (WB)                                  |
| Beclin 1              | Santa Cruz Biotechnology  | sc-11427   | 0.2 µg/ml (WB)                                  |
| Parkin                | Santa Cruz Biotechnology  | sc-32282   | 0.2 µg/ml (WB)<br>2 µg/ml (IP)                  |
| flag                  | Sigma                     | F3165      | 0.2 µg/ml (WB)<br>10 µg/ml (IF)<br>2 µg/ml (IP) |
| OXPPOS                | Invitrogen                | 45-7999    | 1:5000 (WB)                                     |



|                                                          |                    |            |               |
|----------------------------------------------------------|--------------------|------------|---------------|
| Alpha-Smooth muscle actin eFluor-570                     | Invitrogen         | 41-9760-82 | 2 µg/ml (IF)  |
| Alexa Fluor-568 conjugated goat anti-rat IgG antibody    | Invitrogen         | A-11077    | 5 µg/ml (IF)  |
| Alexa Fluor-568 conjugated goat anti-mouse IgG antibody  | Invitrogen         | A-11031    | 5 µg/ml (IF)  |
| Alexa Fluor-647 conjugated goat anti-mouse IgG antibody  | Invitrogen         | A-21237    | 5 µg/ml (IF)  |
| Alexa Fluor-488 conjugated goat anti-rat IgG antibody    | Invitrogen         | A-11006    | 5 µg/ml (IF)  |
| Alexa Fluor-488 conjugated goat anti-rabbit IgG antibody | Invitrogen         | A-11034    | 5 µg/ml (IF)  |
| Mouse monoclonal AIBP (BE-1)                             | Generated in house | N/A        | 10 µg/ml (IF) |
| Rabbit polyclonal AIBP                                   | Generated in house | N/A        | 1:5000 (WB)   |

WB, Westernblot; IF, Immunofluorescence; FC, Flow cytometry; IP, Immunoprecipitation

### Oligonucleotides

| Gene        | Sequence                                                                    | Vendor or Source |
|-------------|-----------------------------------------------------------------------------|------------------|
| Cyclophilin | Forward : 5'TGGAGAGCACCAAGACAGACA3'<br>Reverse : 5'TGCCGGAGTCGACAATGAT3'    | This paper       |
| Atg5        | Forward : 5'CTCCTCAGAGAAGTCTGTCCTT3'<br>Reverse : 5'GGTTTCCAGCATTGGCTCTAT3' | This paper       |
| Atg7        | Forward : 5'TCCTGAGAGCATCCCTCTAAT3'<br>Reverse : 5'GGCTCGACACAGATCATCATAG3' | This paper       |
| Beclin1     | Forward : 5'CAGGAACTCACAGCTCCATTAC3'<br>Reverse : 5'CCATCCTGGCGAGTTTCAATA3' | This paper       |
| Map11c3b    | Forward : 5'GCTTGCAGCTCAATGCTAAC3'<br>Reverse : 5'TCTCTCTCACTCTCGTACACTT3'  | This paper       |
| Sqstm1      | Forward : 5'AACAGATGGAGTCGGGAAAC3'<br>Reverse : 5'AGACTGGAGTTCACCTGTAGA3'   | This paper       |
| Lamp1       | Forward : GACCCTGAAAGTGGAGAACAA<br>Reverse : GGGCATCAGGAAGAGTCATATT         | This paper       |
| Cd36        | Forward : 5'TGGAGCAACTGGTGGATGGTT3'<br>Reverse : 5'TTTTCTACGTGGCCCGGTTTC3'  | This paper       |

### Other

| Description                          | Vendor and Sources         | Catalog No |
|--------------------------------------|----------------------------|------------|
| Western diet                         | Envigo                     | TD.96121   |
| <i>Ldlr</i> ASO                      | Ionis Pharmaceuticals, Inc | ION 713852 |
| Total cholesterol quantification kit | Biovision                  | K603       |
| Triglycerides quantification kit     | EnzyChrom                  | ETGA-200   |
| Oil red O                            | Sigma                      | O0625      |
| Hematoxylin                          | Vector Laboratories        | H-3404     |
| Protein A resin                      | Genesee Scientific         | 20-528     |
| Protein G resin                      | Genesee Scientific         | 20-537     |

|                                                  |                            |                                     |
|--------------------------------------------------|----------------------------|-------------------------------------|
| Protease Inhibitor Cocktail                      | MCE                        | HY-K0010                            |
| Formaldehyde                                     | ThermoFisher Scientific    | BP531-500                           |
| Vector Red substrate                             | Vector                     | SK-5100                             |
| Simpo-Mount                                      | IHC World                  | EO3-18                              |
| DMEM                                             | Cellgro                    | 10-013-CV                           |
| FBS                                              | Omega Scientific           | FB-01                               |
| Gentamicin                                       | Omega Scientific           | GT-10                               |
| Human LDL                                        | Alfa Aesar                 | BT-603                              |
| AcLDL                                            | Lee Biosolutions           | 360-28-10                           |
| Concentrator                                     | Millipore                  | UFC810024                           |
| DCF-DA                                           | Invitrogen                 | D399                                |
| MitoSox Red                                      | Invitrogen                 | M36008                              |
| Bafilomycin A1                                   | Calbiochem                 | 196000                              |
| JC-1 assay kit                                   | ThermoFisher Scientific    | M34152                              |
| CCCP                                             | Sigma-Aldrich              | C2759                               |
| GenJet In Vitro DNA transfection reagent         | SignaGen Laboratories      | SL100488                            |
| Nu-PAGE Bis-Tris gels                            | Invitrogen                 | NP0321BOX<br>NP0322BOX<br>NP0323BOX |
| TBS                                              | Apex Bio Research Products | 18-236B                             |
| DPBS                                             | Corning                    | 20-030-CV                           |
| 2-Propanol                                       | Fisher Scientific          | A416500                             |
| Nucleospin RNA columns                           | Clontech                   | 740984                              |
| EcoDry                                           | Clontech                   | 639549                              |
| KAPA SYBR FAST qPCR kit                          | KAPA Biosystems            | KK4602                              |
| Prolong Gold AntiFade reagent with DAPI          | Cell Signaling Technology  | 8961                                |
| Annexin V-FITC apoptosis detection kit           | eBioscience                | BMS500FI                            |
| Puromycin                                        | InvivoGen                  | ant-pr-1                            |
| Blaticidin                                       | InvivoGen                  | ant-bl-05                           |
| Hexadimethrine bromide (polybrene)               | Sigma                      | H9268                               |
| Mitochondria isolation kit                       | ThermoFisher Scientific    | 89874                               |
| pCHAC-mito-mKeima                                | Addgene                    |                                     |
| <i>In Situ</i> Cell Death Detection Kit, TMR red | Sigma-Aldrich              | 12156792910                         |
| pCHAC-mt-mKeima                                  | Addgene                    | 72342                               |
| ImagePro                                         | Media Cybernetics          | software                            |
| Image J                                          | NIH                        | software                            |
| GraphPad Prism                                   | GraphPad Software          | software                            |
